# Supplementary material
Source: publisher figshare collection journal article supplement (https://acs.figshare.com/ndownloader/files/10350252)
Supplement: Supplementary file 1 [file 10350252]

# Supporting Information

## An Epidermis-Like Hierarchical Smart Coating with a Hardness of Tooth Enamel

Xiaodong Qi,<sup>1</sup> Dan Zhang,<sup>2</sup> Zhongbao Ma,<sup>1</sup> Wenxin Cao,<sup>3</sup> Ying Hou,<sup>1</sup> Jiaqi Zhu,<sup>3</sup> Yang Gan<sup>2</sup> and Ming Yang<sup>1,\*</sup>

<sup>1</sup>Key Laboratory of Microsystems and Micronanostructures Manufacturing, <sup>2</sup>School of chemistry and Chemical Engineering, <sup>3</sup>Center for Composite Materials and Structures, Harbin Institute of Technology, 2 Yikuang Street, Harbin 150080, P.R. China

### A List of Figures and Tables

**Figure S1.** Cross-sectional SEM images of (PVA<sub>145k</sub>/TA)<sub>50</sub>@(PVA<sub>145k</sub>-GO/TA)<sub>10</sub>.

**Figure S2.** QCM results for the growth of first ten bilayers of PVA<sub>145k</sub>/TA and PVA<sub>145k</sub>-GO/TA.

**Figure S3.** a) The AFM image and b) thickness profiles of GO.

**Figure S4.** Compilation of UV-vis spectra of PVA<sub>47k</sub>-GO/TA during the growth of first 10 bilayers on a) (PVA<sub>47k</sub>/TA)<sub>50</sub> and b) glass substrates.

**Figure S5.** Compilation of UV-vis spectra of PVA<sub>145k</sub>-GO/TA during the growth of the first 10 bilayers on a) (PVA<sub>145k</sub>/TA)<sub>50</sub> and b) glass substrates. The insets are the plotting of absorbance at 345 nm against the number of bilayers.

**Figure S6.** SEM images of (PVA<sub>145k</sub>-GO/TA)<sub>10</sub> growing on a) (PVA<sub>145k</sub>/TA)<sub>50</sub> and b) glass substrates.

**Figure S7.** Cross-sectional SEM images of a) (PVA<sub>145k</sub>/TA)<sub>50</sub>@(PVA<sub>145k</sub>-GO/TA)<sub>10</sub> and b) (PVA<sub>145k</sub>-GO/TA)<sub>10</sub> on glass substrates.

**Figure S8.** Optical images of a) (PVA<sub>47k</sub>/TA)<sub>50</sub>@(PVA<sub>47k</sub>-GO/TA)<sub>10</sub> and b) (PVA<sub>47k</sub>/TA)<sub>80</sub>@(PVA<sub>47k</sub>-GO/TA)<sub>10</sub> with different scratch/healing cycles.

**Figure S9.** Optical and SEM images of a) (PVA<sub>145k</sub>/TA)<sub>30</sub>@(PVA<sub>145k</sub>-GO/TA)<sub>10</sub>, b) (PVA<sub>145k</sub>/TA)<sub>50</sub>@(PVA<sub>145k</sub>-GO/TA)<sub>10</sub> and c) (PVA<sub>145k</sub>/TA)<sub>80</sub>@(PVA<sub>145k</sub>-GO/TA)<sub>10</sub> with a 50 μm wide cut throughout the film before and after immersion in water for 30 min.

**Figure S10.** Optical images of a) (PVA<sub>145k</sub>/TA)<sub>50</sub>@(PVA<sub>145k</sub>-GO/TA)<sub>10</sub> and b) (PVA<sub>145k</sub>/TA)<sub>80</sub>@(PVA<sub>145k</sub>-GO/TA)<sub>10</sub> with different cutting-healing cycles. The insets indicate the emergence of unrecovered surface scratch.

**Figure S11.** Optical images of a) (PVA<sub>47k</sub>/TA)<sub>50</sub>@(PVA<sub>47k</sub>-GO/TA)<sub>10</sub>, b) (PVA<sub>145k</sub>/TA)<sub>50</sub>@(PVA<sub>145k</sub>-GO/TA)<sub>10</sub>, c) (PVA<sub>47k</sub>/TA)<sub>80</sub>@(PVA<sub>47k</sub>-GO/TA)<sub>10</sub>, and d) (PVA<sub>145k</sub>/TA)<sub>80</sub>@(PVA<sub>145k</sub>-GO/TA)<sub>10</sub> scratched by a sand paper before and after immersion in water for 30 min.

**Figure S12.** Optical and SEM images of a) (PVA<sub>145k</sub>/TA)<sub>50</sub>@(PVA<sub>145k</sub>-GO/TA)<sub>5</sub>, b) (PVA<sub>145k</sub>/TA)<sub>50</sub>@(PVA<sub>145k</sub>-GO/TA)<sub>8</sub>, c) (PVA<sub>145k</sub>/TA)<sub>50</sub>@(PVA<sub>145k</sub>-GO/TA)<sub>12</sub> and d) (PVA<sub>145k</sub>/TA)<sub>50</sub>@(PVA<sub>145k</sub>-GO/TA)<sub>20</sub> with a 50 µm wide cut throughout the film before and after immersion in water for 30 min.

**Figure S13.** Optical and SEM images of a) (PVA<sub>47k</sub>/TA)<sub>30</sub>, b) (PVA<sub>47k</sub>/TA)<sub>50</sub>, c) (PVA<sub>47k</sub>/TA)<sub>80</sub>, d) (PVA<sub>145k</sub>/TA)<sub>30</sub>, e) (PVA<sub>145k</sub>/TA)<sub>50</sub> and f) (PVA<sub>145k</sub>/TA)<sub>80</sub> with a 50 µm wide cut throughout the film before and after immersion in water for 30 min.

**Figure S14** Optical and SEM images of a) (PVA<sub>47k</sub>-GO/TA)<sub>10</sub>, b) (PVA<sub>47k</sub>-GO/TA)<sub>50</sub>, c) (PVA<sub>47k</sub>-GO/TA)<sub>80</sub>, d) (PVA<sub>145k</sub>-GO/TA)<sub>10</sub>, e) (PVA<sub>145k</sub>-GO/TA)<sub>50</sub> and f) (PVA<sub>145k</sub>-GO/TA)<sub>80</sub> with a 50 µm wide cut throughout the film before and after immersion in water for 30 min.

**Figure S15.** a) Surface and b) Cross-sectional SEM images of (PVA<sub>47k</sub>/TA)<sub>50</sub> coatings with a 50 µm wide cut through the film before and after immersion in water for different lengths of time.

**Figure S16.** a) Surface and b) Cross-sectional SEM images of (PVA<sub>47k</sub>-GO/TA)<sub>10</sub> coatings with a 50 µm wide cut through the film before and after immersion in water for different lengths of time.

**Figure S17.** A side view of the self-healing process on an e-LBL film with a thickness of  $h$  and a width of  $w$  (not shown in this schematic drawing). The white rectangular region denotes the crack with a width of  $z$ .  $c_1$ ,  $c_2$  and  $c_3$  are polymer concentrations in the film, crack area and solution, respectively.  $k_{in}$  and  $k_{out}$  are the mass transfer coefficients into and out of the crack area.

**Figure S18.** Cross-sectional fluorescent optical images of a) (PVA<sub>145k</sub>/TA)<sub>50</sub> and (PVA<sub>145k</sub>-GO/TA)<sub>10</sub> after their immersion into PVA<sub>145k</sub>-c solutions for 5 min and 1 min, respectively. The immersion time is chosen to avoid complete diffusion across the film so that the diffusion rate can be calculated.

**Figure S19.** TGA results for GO, (PVA<sub>145k</sub>/TA)<sub>50</sub>, (PVA<sub>47k</sub>/TA)<sub>50</sub>, (PVA<sub>145k</sub>-GO/TA)<sub>10</sub> and (PVA<sub>47k</sub>-GO/TA)<sub>10</sub>.

**Figure S20.** IR spectra of PVA<sub>47k</sub>, TA and the solutions after immersion of (PVA<sub>47k</sub>/TA)<sub>50</sub>, (PVA<sub>47k</sub>/TA)<sub>50</sub>@(PVA<sub>47k</sub>-GO/TA)<sub>5</sub>, (PVA<sub>47k</sub>/TA)<sub>50</sub>@(PVA<sub>47k</sub>-GO/TA)<sub>10</sub>, (PVA<sub>47k</sub>/TA)<sub>50</sub>@(PVA<sub>47k</sub>-GO/TA)<sub>20</sub>, and (PVA<sub>47k</sub>-GO/TA)<sub>10</sub> into 50 mL DI water for 30 min.

**Figure S21.** Surface fluorescent optical images of (PVA<sub>145k</sub>/TA)<sub>50</sub>(PVA<sub>145k</sub>-c/TA) after the additional depositions of a) 0, b) 5, c) 10 and d) 20 bilayers of PVA<sub>145k</sub>-GO/TA and e) 5 and f) 10 bilayers of PVA<sub>145k</sub>/TA.

**Figure S22.** The plotting of TA absorbance against different lengths of immersion time in 50 mL water for a) (PVA<sub>47k</sub>-GO/TA)<sub>10</sub> and (PVA<sub>47k</sub>/TA)<sub>50</sub> with different bilayers of (PVA<sub>47k</sub>-GO/TA) and b) (PVA<sub>145k</sub>-GO/TA)<sub>10</sub> and (PVA<sub>145k</sub>/TA)<sub>50</sub> with different bilayers of (PVA<sub>145k</sub>-GO/TA) on the top.

**Figure S23.** a,b) Cross-sectional and c,d) surface fluorescent optical images of a,c) (PVA<sub>47k</sub>-c-GO/TA)(PVA<sub>47k</sub>-GO/TA)<sub>9</sub> and b,d) (PVA<sub>47k</sub>-c-GO/TA)(PVA<sub>47k</sub>-GO/TA)<sub>19</sub>.

The dotted surface fluorescence may be due to the high roughness of l-LBL film growing on glass substrates. The insets in a and b indicate the thickness of the film.

**Figure S24.** a,b) Cross-sectional and c,d) surface fluorescent optical images of a,c)  $(\text{PVA}_{145\text{k}}\text{-c-GO/TA})(\text{PVA}_{145\text{k}}\text{-GO/TA})_9$  and b,d)  $(\text{PVA}_{145\text{k}}\text{-c-GO/TA})(\text{PVA}_{145\text{k}}\text{-GO/TA})_{19}$ . The dotted surface fluorescence may be due to the high roughness of l-LBL film growing on glass substrates. The insets in a and b indicate the thickness of the film.

**Figure S25.** SEM images of a)  $(\text{PVA}_{47\text{k}}/\text{TA})_{50} @ (\text{PVA}_{47\text{k}}\text{-GO/TA})_{20}$  and b)  $(\text{PVA}_{145\text{k}}/\text{TA})_{50} @ (\text{PVA}_{145\text{k}}\text{-GO/TA})_{20}$ .

**Figure S26.** Optical and SEM images of a)  $(\text{PEG/TA})_{50}$ , b)  $(\text{PEG-GO/TA})_{10}$  and c)  $(\text{PEG/TA})_{50} @ (\text{PEG-GO/TA})_{10}$  coatings with a 50  $\mu\text{m}$  wide cut through the film before and after immersion in water for different lengths of time.

**Figure S27.** Load-displacement curves for a)  $(\text{PVA}_{145\text{k}}/\text{TA})_{50}$ ,  $(\text{PVA}_{145\text{k}}\text{-GO/TA})_{10}$ ,  $(\text{PVA}_{145\text{k}}/\text{TA})_{50} @ (\text{PVA}_{145\text{k}}\text{-GO/TA})_{10}$  and b) the crack area after self-healing for  $(\text{PVA}_{47\text{k}}/\text{TA})_{50} @ (\text{PVA}_{47\text{k}}\text{-GO/TA})_{10}$  and  $(\text{PVA}_{145\text{k}}/\text{TA})_{50} @ (\text{PVA}_{145\text{k}}\text{-GO/TA})_{10}$ .

**Table S1.** A summary of modulus and hardness for different multilayers consisting of  $\text{PVA}_{145\text{k}}$  obtained from nanoindentation.

**Table S2.** A summary of modulus and hardness for hybrid films before and after self-healing obtained from nanoindentation.

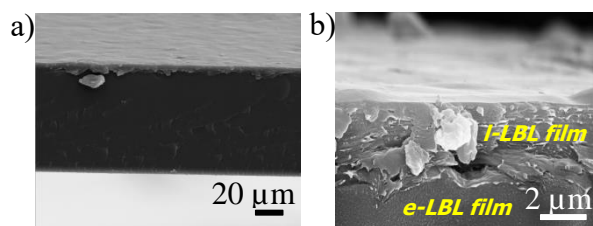

**Figure S1.** Cross-sectional SEM images of  $(\text{PVA}_{145\text{k}}/\text{TA})_{50} @ (\text{PVA}_{145\text{k}}\text{-GO}/\text{TA})_{10}$ .

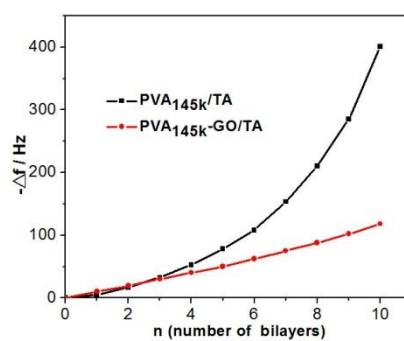

**Figure S2.** QCM results for the growth of first ten bilayers of  $\text{PVA}_{145\text{k}}/\text{TA}$  and  $\text{PVA}_{145\text{k}}\text{-GO}/\text{TA}$ .

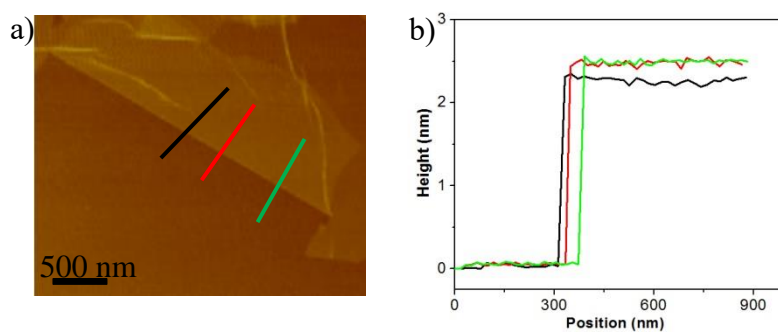

**Figure S3.** a) The AFM image and b) thickness profiles of GO.

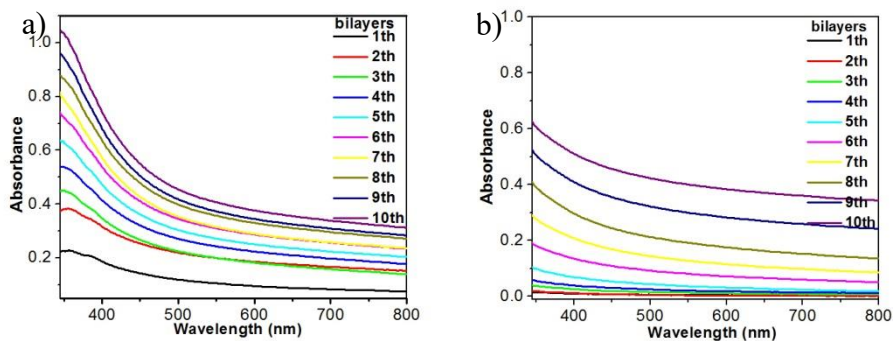

**Figure S4.** Compilation of UV-vis spectra of PVA<sub>47k</sub>-GO/TA during the growth of first 10 bilayers on a) (PVA<sub>47k</sub>/TA)<sub>50</sub> and b) glass substrates.

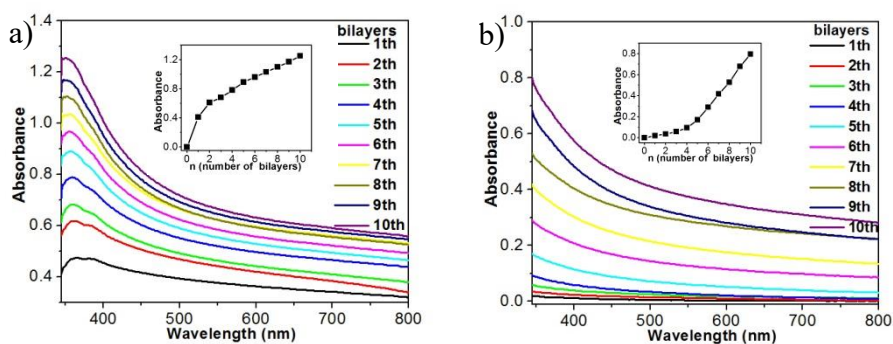

**Figure S5.** Compilation of UV-vis spectra of PVA<sub>145k</sub>-GO/TA during the growth of the first 10 bilayers on a) (PVA<sub>145k</sub>/TA)<sub>50</sub> and b) glass substrates. The insets are the plotting of absorbance at 345 nm against the number of bilayers.

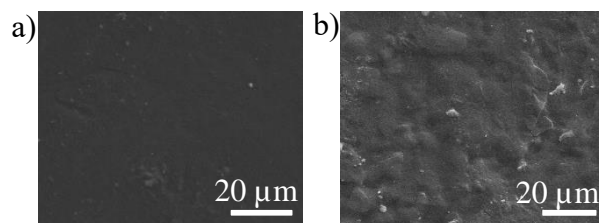

**Figure S6.** SEM images of (PVA<sub>145k</sub>-GO/TA)<sub>10</sub> growing on a) (PVA<sub>145k</sub>/TA)<sub>50</sub> and b) glass substrates.

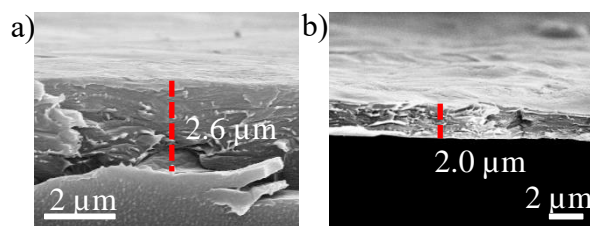

**Figure S7.** Cross-sectional SEM images of a)  $(\text{PVA}_{145\text{k}}/\text{TA})_{50} @ (\text{PVA}_{145\text{k}}\text{-GO}/\text{TA})_{10}$  and b)  $(\text{PVA}_{145\text{k}}\text{-GO}/\text{TA})_{10}$  on glass substrates.

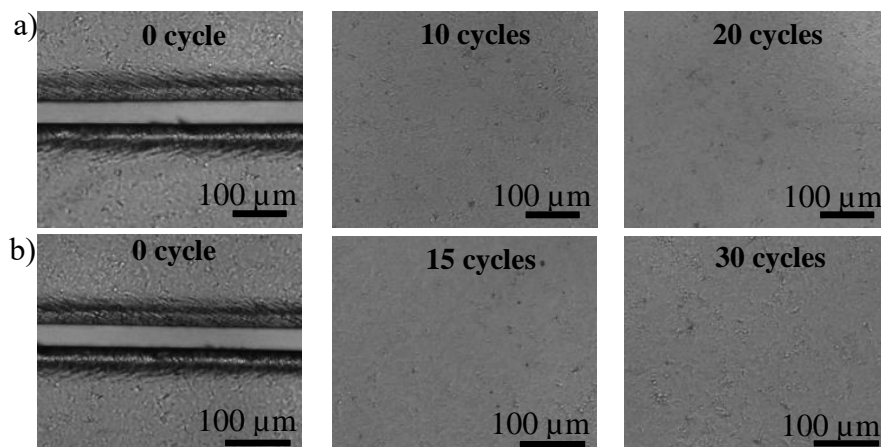

**Figure S8.** Optical images of a)  $(\text{PVA}_{47\text{k}}/\text{TA})_{50} @ (\text{PVA}_{47\text{k}}\text{-GO}/\text{TA})_{10}$  and b)  $(\text{PVA}_{47\text{k}}/\text{TA})_{80} @ (\text{PVA}_{47\text{k}}\text{-GO}/\text{TA})_{10}$  with different scratch/healing cycles.

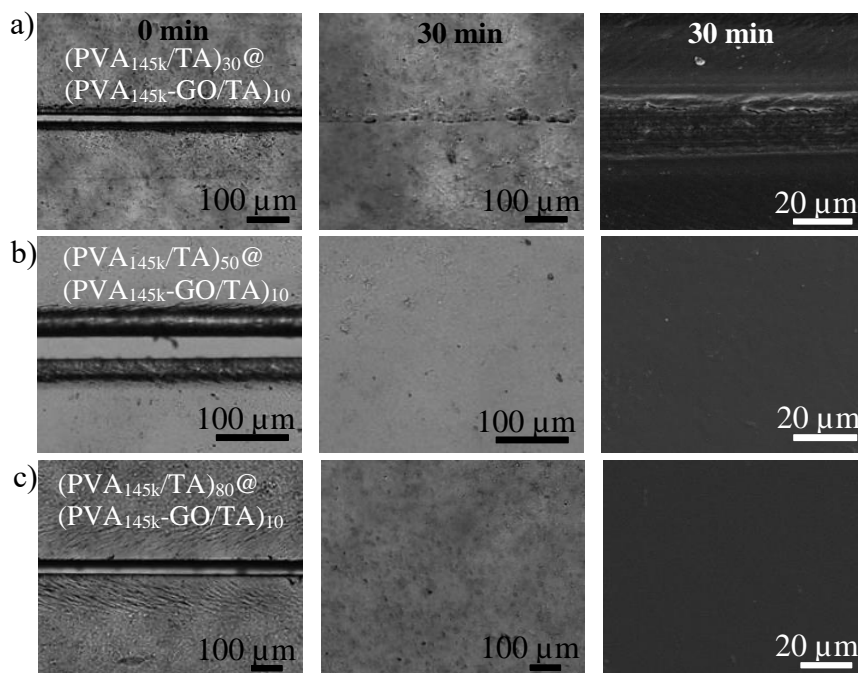

**Figure S9.** Optical and SEM images of a)  $(\text{PVA}_{145\text{k}}/\text{TA})_{30} @ (\text{PVA}_{145\text{k}}\text{-GO}/\text{TA})_{10}$ , b)  $(\text{PVA}_{145\text{k}}/\text{TA})_{50} @ (\text{PVA}_{145\text{k}}\text{-GO}/\text{TA})_{10}$  and c)  $(\text{PVA}_{145\text{k}}/\text{TA})_{80} @ (\text{PVA}_{145\text{k}}\text{-GO}/\text{TA})_{10}$  with a 50  $\mu\text{m}$  wide cut throughout the film before and after immersion in water for 30 min.

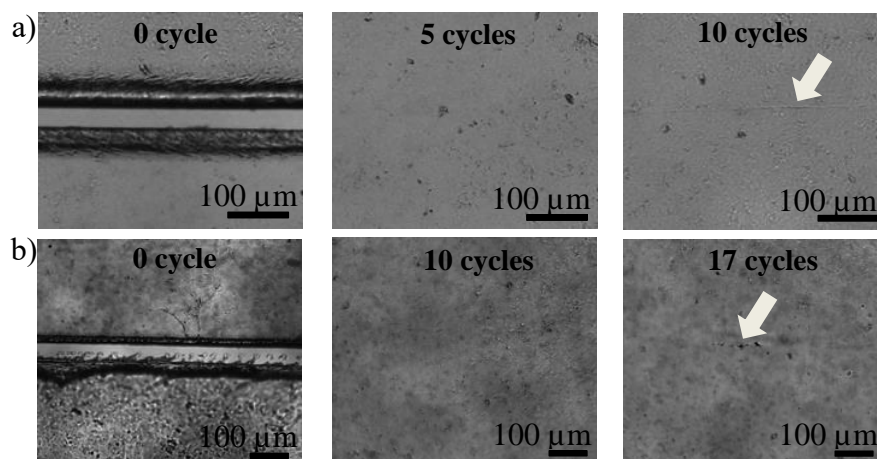

**Figure S10.** Optical images of a)  $(\text{PVA}_{145\text{k}}/\text{TA})_{50} @ (\text{PVA}_{145\text{k}}\text{-GO}/\text{TA})_{10}$  and b)  $(\text{PVA}_{145\text{k}}/\text{TA})_{80} @ (\text{PVA}_{145\text{k}}\text{-GO}/\text{TA})_{10}$  with different cutting-healing cycles. The insets indicate the emergence of unrecovered surface scratch.

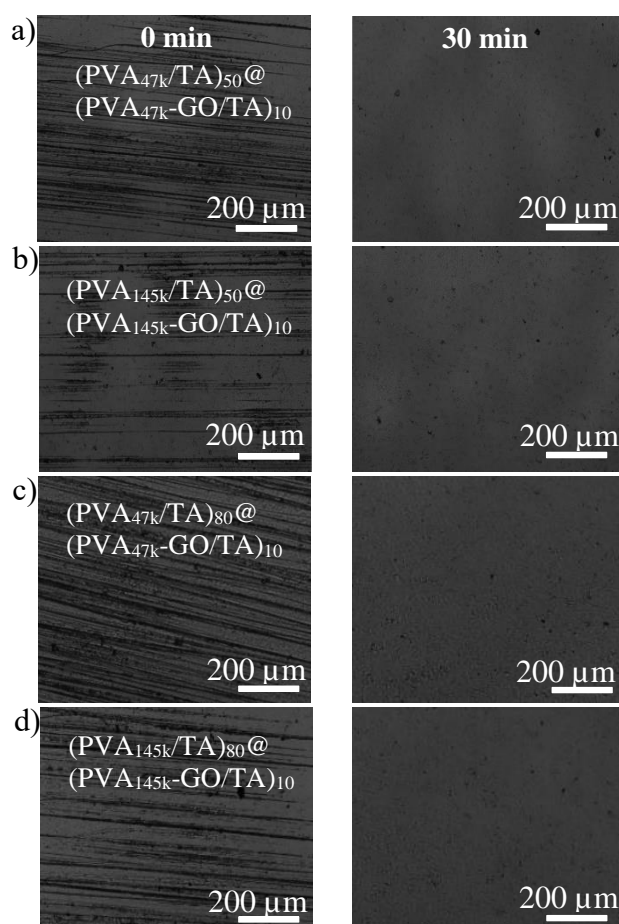

**Figure S11.** Optical images of a)  $(\text{PVA}_{47\text{k}}/\text{TA})_{50} @ (\text{PVA}_{47\text{k}}\text{-GO}/\text{TA})_{10}$ , b)  $(\text{PVA}_{145\text{k}}/\text{TA})_{50} @ (\text{PVA}_{145\text{k}}\text{-GO}/\text{TA})_{10}$ , c)  $(\text{PVA}_{47\text{k}}/\text{TA})_{80} @ (\text{PVA}_{47\text{k}}\text{-GO}/\text{TA})_{10}$ , and d)  $(\text{PVA}_{145\text{k}}/\text{TA})_{80} @ (\text{PVA}_{145\text{k}}\text{-GO}/\text{TA})_{10}$  scratched by a sand paper before and after immersion in water for 30 min.

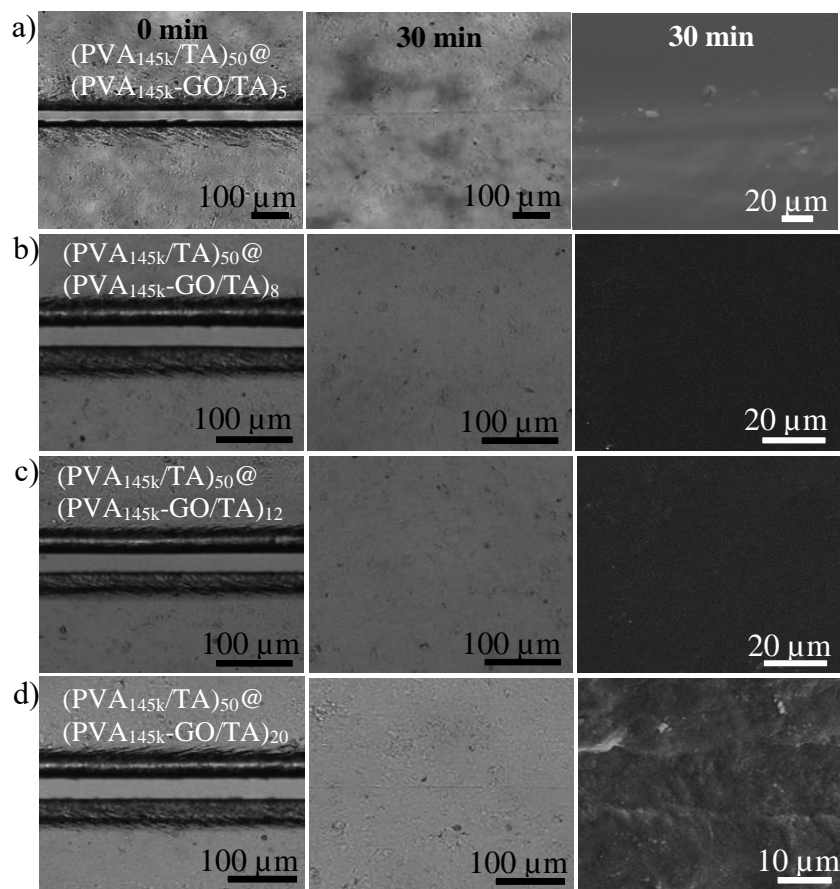

**Figure S12.** Optical and SEM images of a)  $(PVA_{145k}/TA)_{50}@ (PVA_{145k}-GO/TA)_5$ , b)  $(PVA_{145k}/TA)_{50}@ (PVA_{145k}-GO/TA)_8$  c)  $(PVA_{145k}/TA)_{50}@ (PVA_{145k}-GO/TA)_{12}$  and d)  $(PVA_{145k}/TA)_{50}@ (PVA_{145k}-GO/TA)_{20}$  with a 50 μm wide cut throughout the film before and after immersion in water for 30 min.

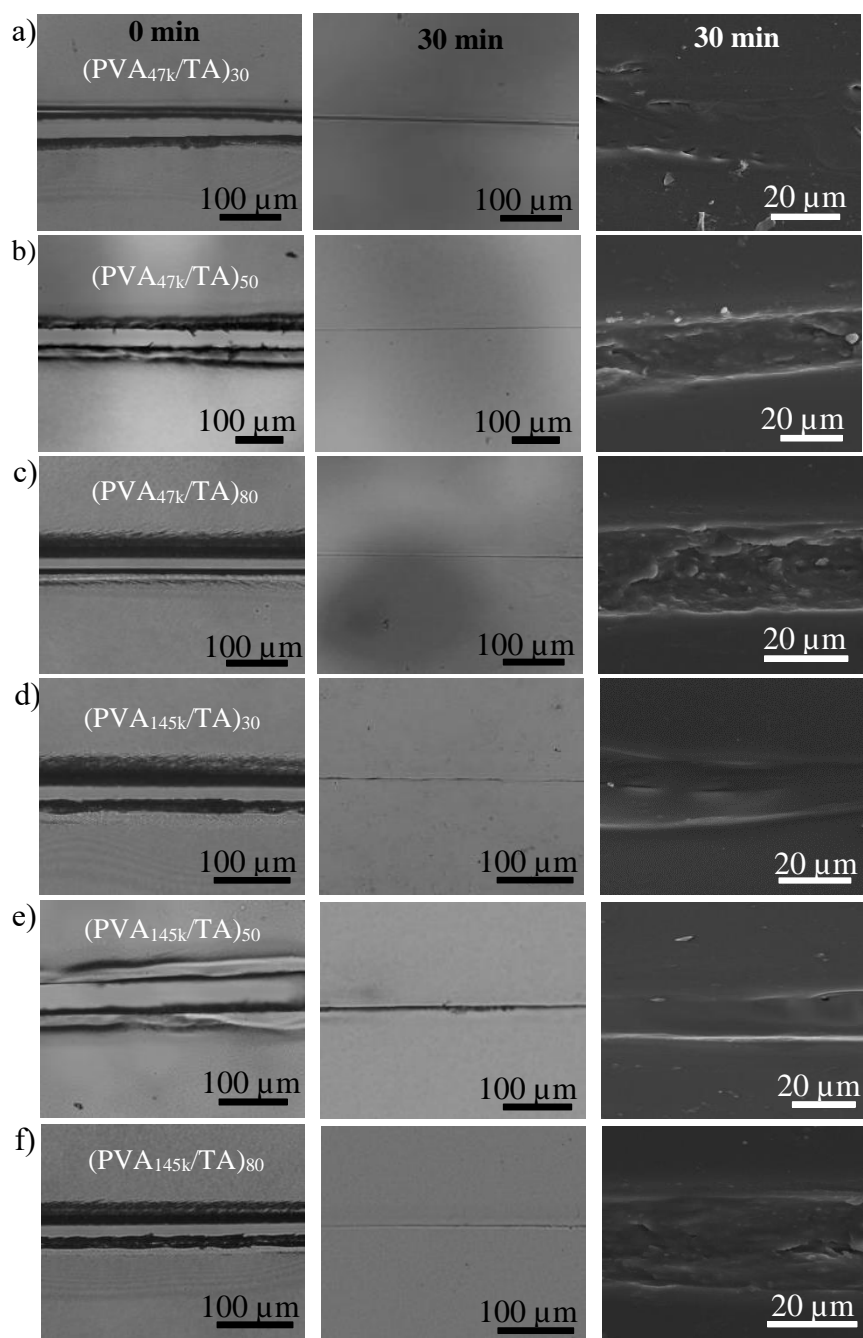

**Figure S13.** Optical and SEM images of a) (PVA<sub>47k</sub>/TA)<sub>30</sub>, b) (PVA<sub>47k</sub>/TA)<sub>50</sub>, c) (PVA<sub>47k</sub>/TA)<sub>80</sub>, d) (PVA<sub>145k</sub>/TA)<sub>30</sub>, e) (PVA<sub>145k</sub>/TA)<sub>50</sub> and f) (PVA<sub>145k</sub>/TA)<sub>80</sub> with a 50 μm wide cut throughout the film before and after immersion in water for 30 min.

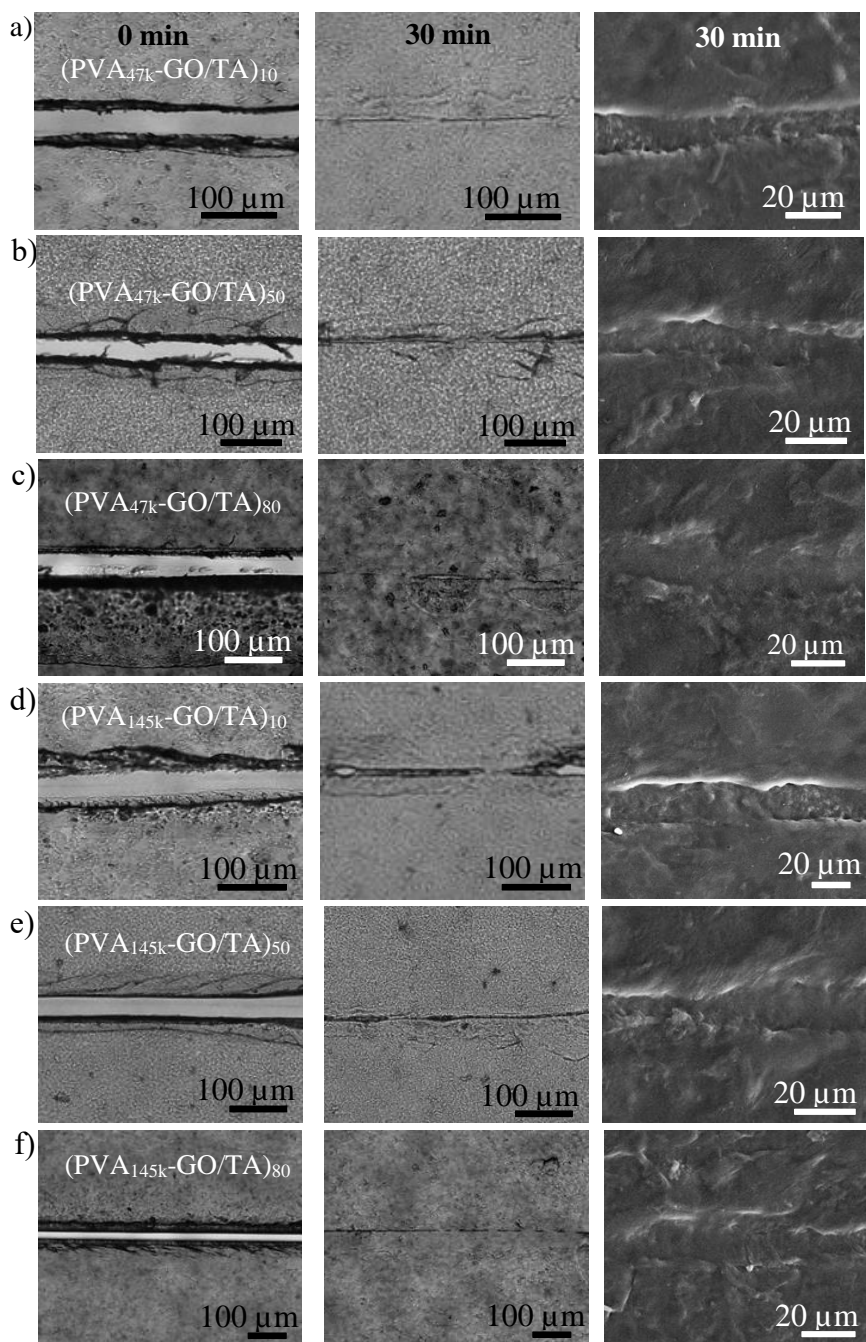

**Figure S14** Optical and SEM images of a) (PVA<sub>47k</sub>-GO/TA)<sub>10</sub>, b) (PVA<sub>47k</sub>-GO/TA)<sub>50</sub>, c) (PVA<sub>47k</sub>-GO/TA)<sub>80</sub>, d) (PVA<sub>145k</sub>-GO/TA)<sub>10</sub>, e) (PVA<sub>145k</sub>-GO/TA)<sub>50</sub> and f) (PVA<sub>145k</sub>-GO/TA)<sub>80</sub> with a 50 μm wide cut throughout the film before and after immersion in water for 30 min.

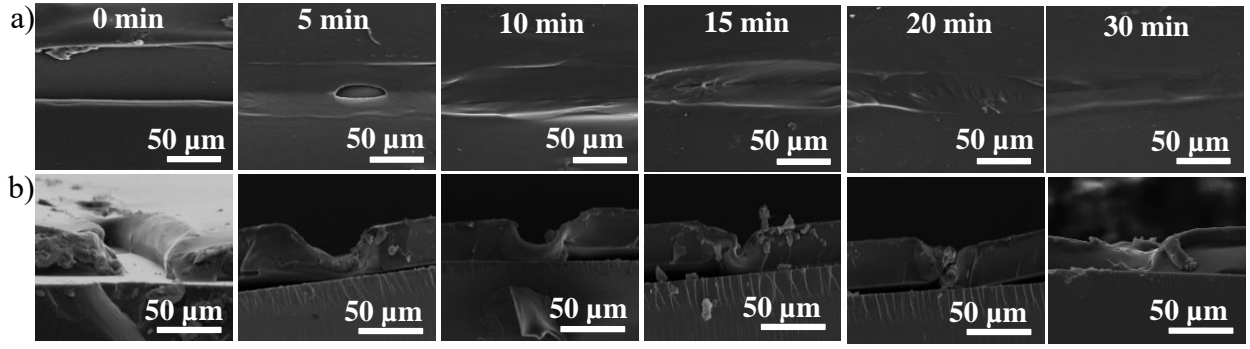

**Figure S15.** a) Surface and b) cross-sectional SEM images of (PVA<sub>47k</sub>/TA)<sub>50</sub> with a 50 μm wide cut throughout the film before and after immersion in water for different lengths of time.

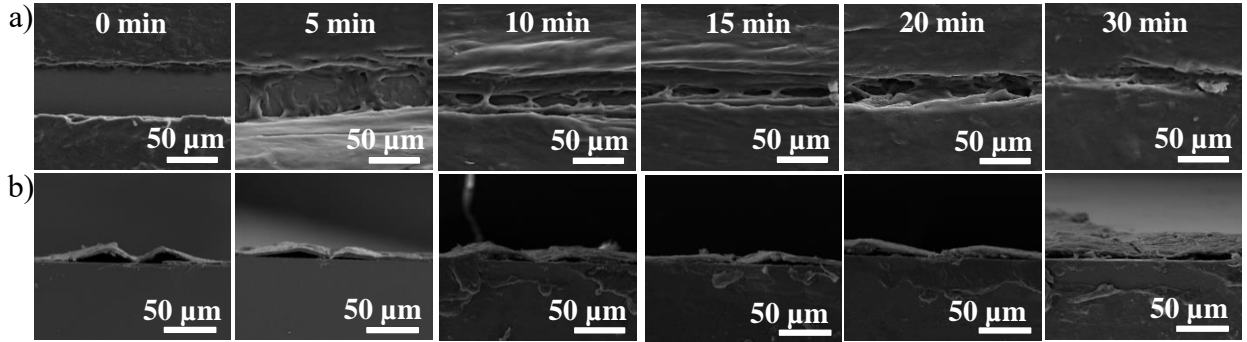

**Figure S16.** a) Surface and b) cross-sectional SEM images of (PVA<sub>47k</sub>-GO/TA)<sub>10</sub> with a 50 μm wide cut throughout the film before and after immersion in water for different lengths of time.

**Details about the development of theoretical model:** The flux ( $J$ ) into and out of the crack area (Figure S17) can be expressed as

$$J_{in} = Ak_{in}(c_1 - c_2) = hwk_{in}(c_1 - c_2) \quad (1)$$

$$J_{out} = A'k_{out}(c_2 - c_3) = zwk_{out}(c_2 - c_3) \quad (2)$$

where  $k_{in}$  and  $k_{out}$  are the mass transfer coefficients into and out of the crack with the cross-sectional areas of  $A$  and  $A'$ , respectively;  $h$  is the thickness of the film,  $z$  is the length of the crack and  $w$  is the width of the film;  $c_1$ ,  $c_2$  and  $c_3$  are polymer concentrations in the film, crack area and solution, respectively.

We also have

$$V \frac{dc_2}{dt} = Ak_{in}(c_1 - c_2) - A'k_{out}(c_2 - c_3) \quad (3)$$

where  $V$  is the volume of the crack part.

We use the initial condition ( $t = 0$ ;  $c_2 = 0$ ) to integrate the mass balance which gives

$$c_2 = \frac{Ak_{in}c_1 + A'k_{out}c_3}{Ak_{in} + A'k_{out}} \left( 1 - e^{-\left(\frac{Ak_{in} + A'k_{out}}{V}\right)t} \right) \quad (4)$$

Here  $c_1$  can be regarded as a constant and  $c_3$  can be essentially zero due to the large volume of the solution. Also consider that  $k_{out}$  is much smaller than  $k_{in}$  due to the interactions between PVA and TA, we have

$$c_2 = c_1 \left( 1 - e^{-\left(\frac{Ak_{in}}{V}\right)t} \right) \quad (5)$$

After a time of  $t_e$ , an equilibrium is established,

$$J_{in} = J_{out} \quad (6)$$

So

$$h k_{in}(c_1 - c_2) = z k_{out}(c_2 - c_3) \quad (7)$$

Combining (5) and (7) gives

$$h k_{in} e^{-\left(\frac{k_{in}A}{V}\right)t_e} c_1 = z k_{out} \left( 1 - e^{-\left(\frac{k_{in}A}{V}\right)t_e} \right) c_1 \quad (8)$$

Then we have

$$e^{-\left(\frac{k_{in}A}{V}\right)t_e} = \frac{z k_{out}}{h k_{in} + z k_{out}} \quad (9)$$

According to (9),  $t_e$  is in reverse proportion to  $k_{out}$ . On the other hand, suppose that after a time period ( $t_r$ ), a complete repair can be achieved. According to (5),  $t_r$  is mainly determined by and reversely proportional to  $k_{in}$ .

As at the equilibrium, no further accumulation in the crack area can be expected, to make a full recovery, it is necessary to have

$$t_r < t_e$$

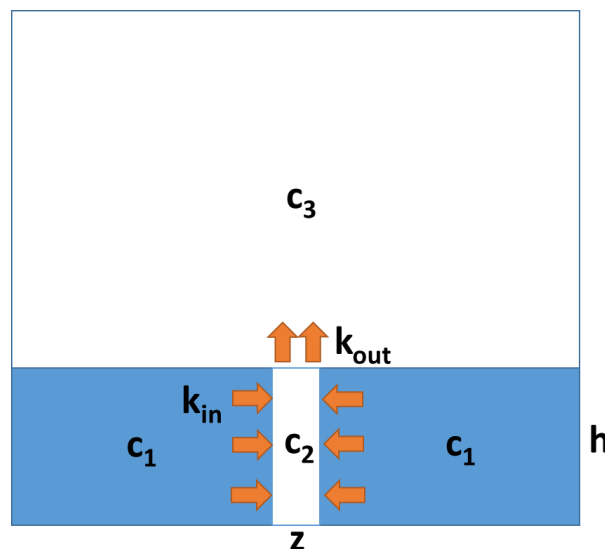

**Figure S17.** A side view of the self-healing process on an e-LBL film with a thickness of  $h$  and a width of  $w$  (not shown in this schematic drawing). The white rectangular region denotes the crack with a width of  $z$ .  $c_1$ ,  $c_2$  and  $c_3$  are polymer concentrations in the film, crack area and solution, respectively.  $k_{in}$  and  $k_{out}$  are the mass transfer coefficients into and out of the crack area.

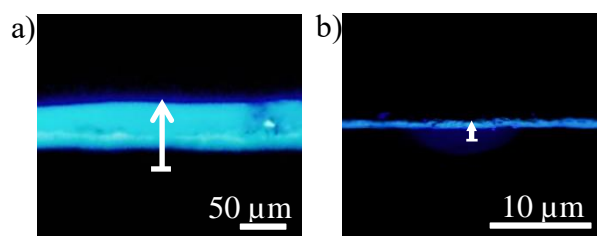

**Figure S18.** Cross-sectional fluorescent optical images of a) (PVA<sub>145k</sub>/TA)<sub>50</sub> and (PVA<sub>145k</sub>-GO/TA)<sub>10</sub> after their immersion into PVA<sub>145k</sub>-c solutions for 5 min and 1 min, respectively. The immersion time is chosen to avoid complete diffusion across the film so that the diffusion rate can be calculated.

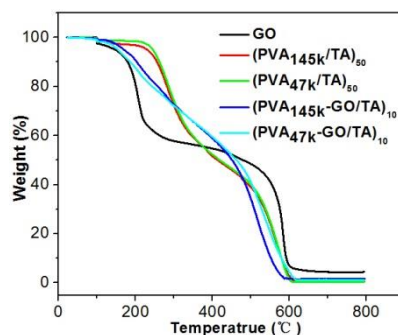

**Figure S19.** TGA results for GO, (PVA<sub>145k</sub>/TA)<sub>50</sub>, (PVA<sub>47k</sub>/TA)<sub>50</sub>, (PVA<sub>145k</sub>-GO/TA)<sub>10</sub> and (PVA<sub>47k</sub>-GO/TA)<sub>10</sub>.

**The determination of GO contents in the film:** Thermogravimetric analysis (TGA) was used to calculate the contents of GO in l-LBL film (Figure S19). (PVA/TA)<sub>50</sub> can decompose completely when reaching 620 °C under oxygen atmosphere, however, GO does not fully decompose at a temperature as high as 800 °C. The above fact provides a simple method to calculate the percentage of GO in (PVA-GO/TA)<sub>10</sub>. In Eq. 1,  $a$  and  $b$  are the remaining contents of GO and (PVA-GO/TA)<sub>10</sub> at 800 °C, respectively;  $x$  is therefore the contents of GO in (PVA-GO/TA)<sub>10</sub>.

$$ax = b \quad (1)$$

According to Eq. 1, there are approximately 30 % and 35 % GO in (PVA<sub>47k</sub>-GO/TA)<sub>10</sub> and (PVA<sub>145k</sub>-GO/TA)<sub>10</sub>, respectively.

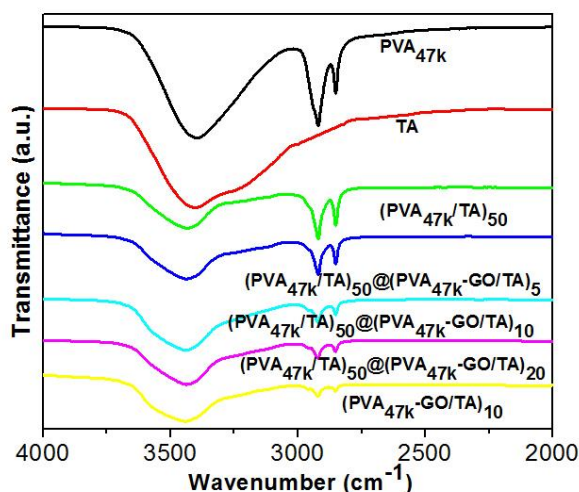

**Figure S20.** IR spectra of PVA<sub>47k</sub>, TA and the solutions after immersion of (PVA<sub>47k</sub>/TA)<sub>50</sub>, (PVA<sub>47k</sub>/TA)<sub>50</sub>@(PVA<sub>47k</sub>-GO/TA)<sub>5</sub>, (PVA<sub>47k</sub>/TA)<sub>50</sub>@(PVA<sub>47k</sub>-GO/TA)<sub>10</sub>, (PVA<sub>47k</sub>/TA)<sub>50</sub>@(PVA<sub>47k</sub>-GO/TA)<sub>20</sub>, and (PVA<sub>47k</sub>-GO/TA)<sub>10</sub> into 50 mL DI water for 30 min.

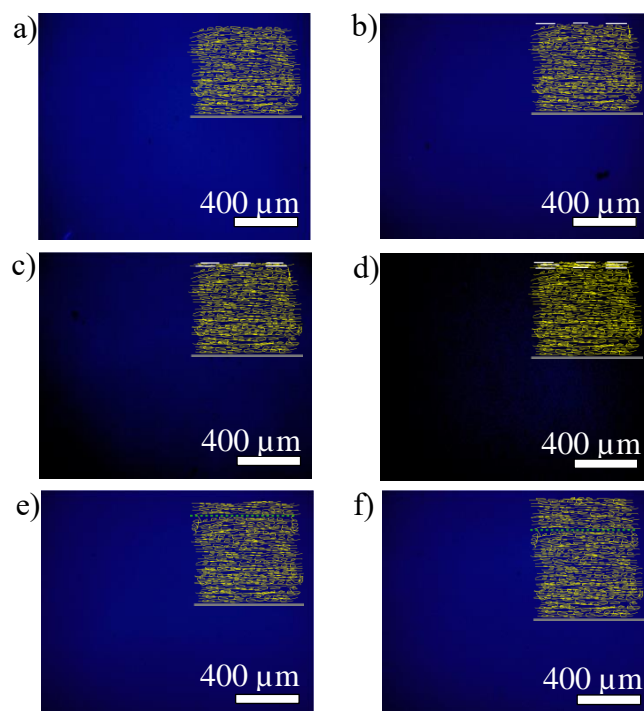

**Figure S21.** Surface fluorescent optical images of  $(\text{PVA}_{145\text{k}}/\text{TA})_{50}(\text{PVA}_{145\text{k}}\text{-c}/\text{TA})$  after the additional depositions of a) 0, b) 5, c) 10 and d) 20 bilayers of  $\text{PVA}_{145\text{k}}\text{-GO}/\text{TA}$  and e) 5 and f) 10 bilayers of  $\text{PVA}_{145\text{k}}/\text{TA}$ .

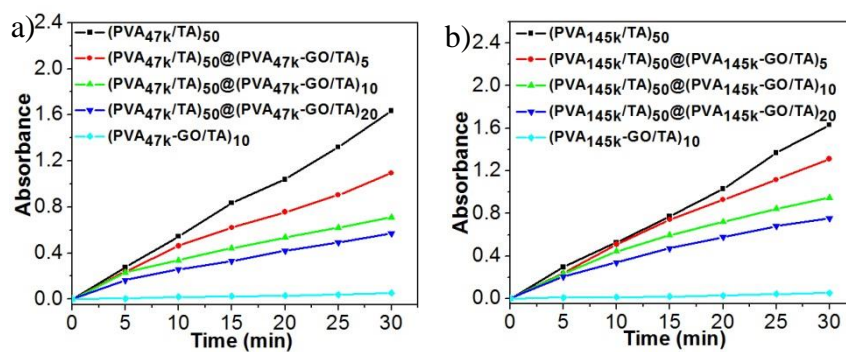

**Figure S22.** The plotting of TA absorbance against different lengths of immersion time in 50 mL water for a)  $(\text{PVA}_{47\text{k}}\text{-GO}/\text{TA})_{10}$  and  $(\text{PVA}_{47\text{k}}/\text{TA})_{50}$  with different bilayers of  $(\text{PVA}_{47\text{k}}\text{-GO}/\text{TA})$  and b)  $(\text{PVA}_{145\text{k}}\text{-GO}/\text{TA})_{10}$  and  $(\text{PVA}_{145\text{k}}/\text{TA})_{50}$  with different bilayers of  $(\text{PVA}_{145\text{k}}\text{-GO}/\text{TA})$  on the top.

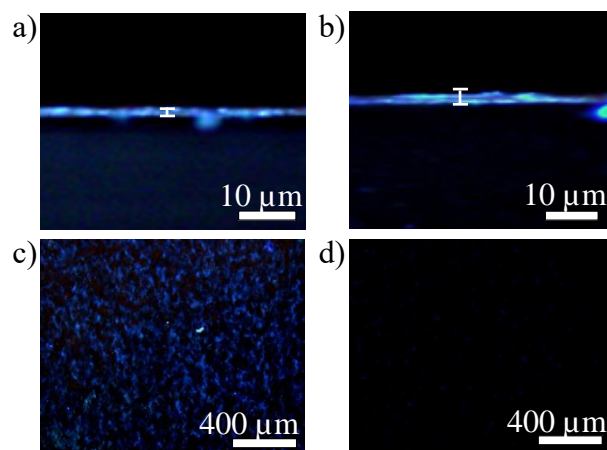

**Figure S23** a,b) Cross-sectional and c,d) surface fluorescent optical images of a,c) (PVA<sub>47k</sub>-c-GO/TA)(PVA<sub>47k</sub>-GO/TA)<sub>9</sub> and b,d) (PVA<sub>47k</sub>-c-GO/TA)(PVA<sub>47k</sub>-GO/TA)<sub>19</sub>. The dotted surface fluorescence may be due to the high roughness of l-LBL film growing on glass substrates. The insets in a and b indicate the thickness of the film.

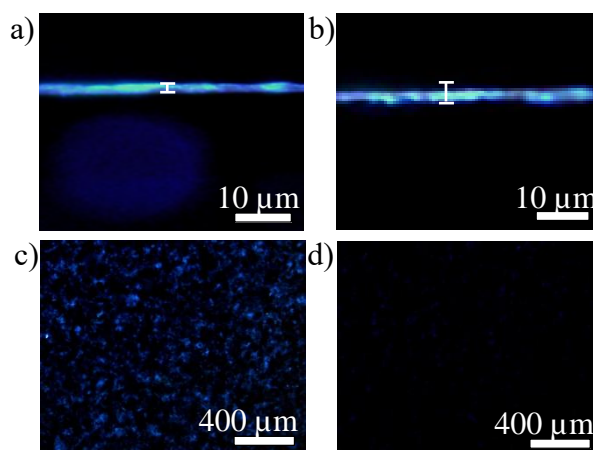

**Figure S24.** a,b) Cross-sectional and c,d) surface fluorescent optical images of a,c) (PVA<sub>145k</sub>-c-GO/TA)(PVA<sub>145k</sub>-GO/TA)<sub>9</sub> and b,d) (PVA<sub>145k</sub>-c-GO/TA)(PVA<sub>145k</sub>-GO/TA)<sub>19</sub>. The dotted surface fluorescence may be due to the high roughness of l-LBL film growing on glass substrates. The insets in a and b indicate the thickness of the film.

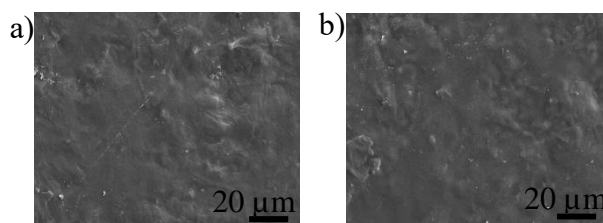

**Figure S25.** SEM images of a) (PVA<sub>47k</sub>/TA)<sub>50</sub>@(PVA<sub>47k</sub>-GO/TA)<sub>20</sub> and b) (PVA<sub>145k</sub>/TA)<sub>50</sub>@(PVA<sub>145k</sub>-GO/TA)<sub>20</sub>.

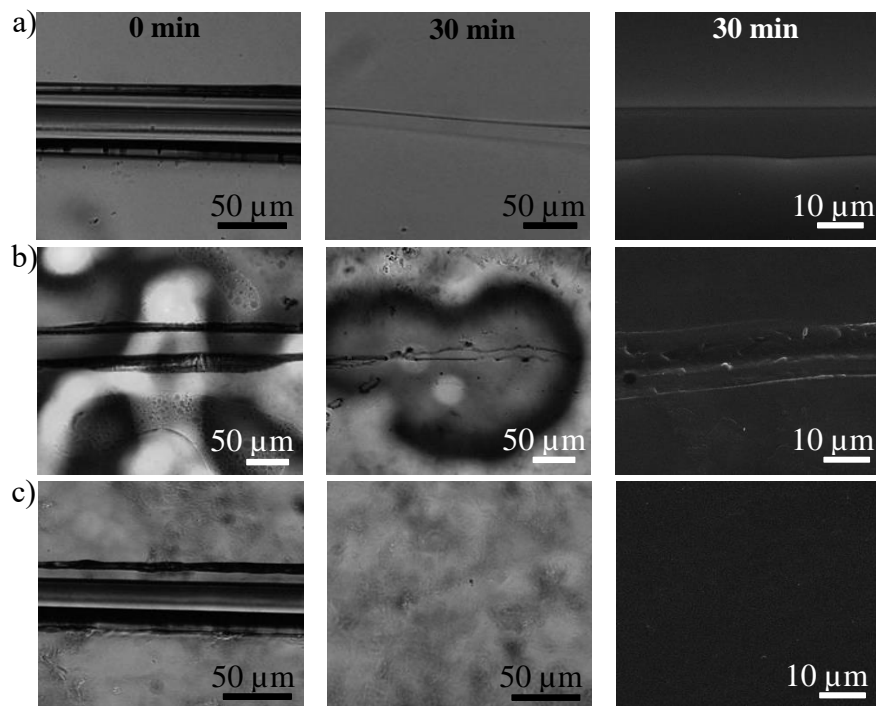

**Figure S26.** Optical and SEM images of a) (PEG/TA)<sub>50</sub>, b) (PEG-GO/TA)<sub>10</sub> and c) (PEG/TA)<sub>50</sub>@(PEG-GO/TA)<sub>10</sub> with a 50 μm wide cut throughout the film before and after immersion in water for 30 min.

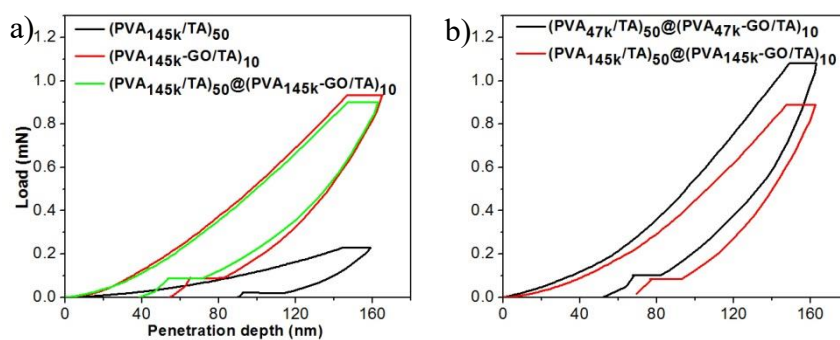

**Figure S27.** Load-displacement curves for a) (PVA<sub>145k</sub>/TA)<sub>50</sub>, (PVA<sub>145k</sub>-GO/TA)<sub>10</sub>, (PVA<sub>145k</sub>/TA)<sub>50</sub>@(PVA<sub>145k</sub>-GO/TA)<sub>10</sub> and b) the crack area after self-healing for (PVA<sub>47k</sub>/TA)<sub>50</sub>@(PVA<sub>47k</sub>-GO/TA)<sub>10</sub> and (PVA<sub>145k</sub>/TA)<sub>50</sub>@(PVA<sub>145k</sub>-GO/TA)<sub>10</sub>.

| Samples                                                                             | Modulus $E$<br>(GPa) | Hardness $H$ (GPa) |
|-------------------------------------------------------------------------------------|----------------------|--------------------|
| (PVA <sub>145k</sub> /TA) <sub>50</sub>                                             | 8.7±0.1              | 0.44±0.02          |
| (PVA <sub>145k</sub> -GO/TA) <sub>10</sub>                                          | 26.7±0.4             | 2.18±0.11          |
| (PVA <sub>145k</sub> /TA) <sub>50</sub> @(PVA <sub>145k</sub> -GO/TA) <sub>10</sub> | 25.1±2.2             | 2.11±0.22          |

**Table S1.** A summary of modulus and hardness for different multilayers consisting of PVA<sub>145k</sub> obtained from nanoindentation.

| Modes               | Samples                                                                             | Modulus $E$<br>(GPa) | Hardness $H$<br>(GPa) |
|---------------------|-------------------------------------------------------------------------------------|----------------------|-----------------------|
| Before self-healing | (PVA <sub>47k</sub> /TA) <sub>50</sub> @(PVA <sub>47k</sub> -GO/TA) <sub>10</sub>   | 31.4±1.8             | 2.27±0.09             |
|                     | (PVA <sub>145k</sub> /TA) <sub>50</sub> @(PVA <sub>145k</sub> -GO/TA) <sub>10</sub> | 25.1±2.2             | 2.11±0.22             |
| After self-healing  | (PVA <sub>47k</sub> /TA) <sub>50</sub> @(PVA <sub>47k</sub> -GO/TA) <sub>10</sub>   | 31.3±1.9             | 2.21±0.05             |
|                     | (PVA <sub>145k</sub> /TA) <sub>50</sub> @(PVA <sub>145k</sub> -GO/TA) <sub>10</sub> | 24.3±0.8             | 2.09±0.26             |

**Table S2.** A summary of modulus and hardness for hybrid films before and after self-healing obtained from nanoindentation.
